# Supplementary material for: Nitrate reduction on the surface of bimetallic catalysts supported by nano-crystalline beta-zeolite (NBeta)
Source: Royal Society of Chemistry journal article supplement (doi:10.1039/c6gc02349e), 2016-12-06
Supplement: c6gc02349e1.pdf [file c6gc02349e1.pdf]

Supporting information for

**Nitrate Reduction on the Surface of Bimetallic Catalysts Supported by Nano-crystalline  
Beta-zeolite (NBeta)**

**Shanawar Hamid<sup>a</sup>, Macharla Arun Kumar<sup>a</sup>, Jong-In Han<sup>a</sup>, Hyungjun Kim<sup>b</sup>, Woojin Lee<sup>c,\*</sup>**

<sup>a</sup> Department of Civil and Environmental Engineering, Korea Advanced Institute of Science and  
Technology, 291 Daehak-ro, Yuseong-gu, Daejeon 34141, Republic of Korea

<sup>b</sup> Graduate School of Energy, Environment, Water, and Sustainability (EEWS), Korea Advanced  
Institute of Science and Technology, 291 Daehak-ro, Yuseong-Gu, Daejeon 305-701, Korea

<sup>c</sup> School of Environmental Science and Engineering, Pohang University of Science and  
Technology, 77 Cheongam-ro, Nam-gu, Pohang 37673, Republic of Korea

\*Corresponding author: phone: 82-10-8835-4292

E-mail: [wojin\\_lee@kaist.edu](mailto:wojin_lee@kaist.edu)

## Characterization of catalysts

The procedures of sample preparation and analyses for characterization were followed from our previous studies.<sup>1-4</sup> However, a brief description of the procedures is given below.

XRD analysis of powder NBeta, Sn-Pd-NBeta, Cu-Pd-NBeta and In-Pd-NBeta catalysts was conducted by Rigaku automated diffractometer with Cu-K $\alpha$  radiation (D/MAX-2500, Rigaku, Japan). The scan range was 2° to 80° 2 $\theta$  and scan speed was 2° min<sup>-1</sup>.

The FT-IR spectra of NBeta, Sn-Pd-NBeta, Cu-Pd-NBeta and In-Pd-NBeta samples were obtained by Nicolet 740 FT-IR spectrometer at ambient conditions and using KBr as the diluent.

Morphology of NBeta and dispersion of Sn, Cu, In and Pd on NBeta surface was analyzed by SEM/EDX (Magellan400, FEI). Samples were prepared by carefully packing of powder catalysts to carbon tape on an SEM template. Osmium coating was applied prior to analysis and the samples were analyzed by SEM at 10 kV.

The morphology of NBeta, Sn-Pd-NBeta, Cu-Pd-NBeta and In-Pd-NBeta catalysts was also characterized by TEM (JEM-3010 model, JEOL). Few milligrams of powder catalysts were dissolved in ethanol and sonicated for 10 min to disperse particles. Samples were prepared by adding several drops of ethanol solution of catalysts on 300-mesh gold TEM grid with a carbon film. The samples were dried in anaerobic chamber for 1 h and then analyzed by TEM at 300 kV.

Surface area of NBeta was measured by nitrogen adsorption and desorption at -196 °C with BET surface analyzer (ASAP 2010, Micrometrics).

Leaching of Sn, Cu, In and Pd were estimated by ICP-MS. The sample was immediately filtered using a 0.2  $\mu$ m membrane filter.

The oxidation states of Sn, Cu, In and Pd were identified by XPS analysis (Sigma Probe, Thermo Scientific, USA) on the surface of NBeta for three conditions i.e. 1) as prepared

catalysts, 2) after reduction with  $\text{NaBH}_4$  and 3) after  $\text{NO}_3^-$  reduction reaction. All the catalysts were collected using a  $0.2 \mu\text{m}$  membrane filter in a vacuum filtration assembly, and dried under freeze-vacuum condition. The dried samples were carefully shifted to XPS templates inside of anaerobic chamber to avoid surface oxidation via ambient oxygen. The C 1s peak at 284.8 eV was used as a reference for adjusting the surface charging effects.

Zeta-potential of Sn-Pd-NBeta, Cu-Pd-NBeta and In-Pd-NBeta suspensions was measured in pH range 3-8.5. Buffer solutions for different pH adjustment were prepared as following: 0.1 M acetate buffer solution was prepared by mixing acetic acid and sodium acetate, 0.1 M phosphate solutions were prepared by mixing a) potassium phosphate and sodium phosphate dibasic heptahydrate and b) sodium phosphate dibasic and hydrochloric acid. The catalysts were reduced by  $\text{NaBH}_4$  and added into the prepared buffer solutions. All the solutions containing catalyst samples were ultra-sonicated for 30 min to disperse the samples before analysis with zetasizer (Zetasizer Nano ZS, Malvern, Korea).

$\text{NH}_3$ -TPD was performed by AutoChem II 2920 (micromeritics USA). To remove the impurities, the sample was heated at  $10 \text{ }^\circ\text{C min}^{-1}$  until  $550 \text{ }^\circ\text{C}$  under the constant flow of helium. Then sample was cooled down to  $100 \text{ }^\circ\text{C}$  and saturated with  $\text{NH}_3$  for 90 min. Then the temperature was increased to  $500 \text{ }^\circ\text{C}$  at  $10 \text{ }^\circ\text{C min}^{-1}$ .

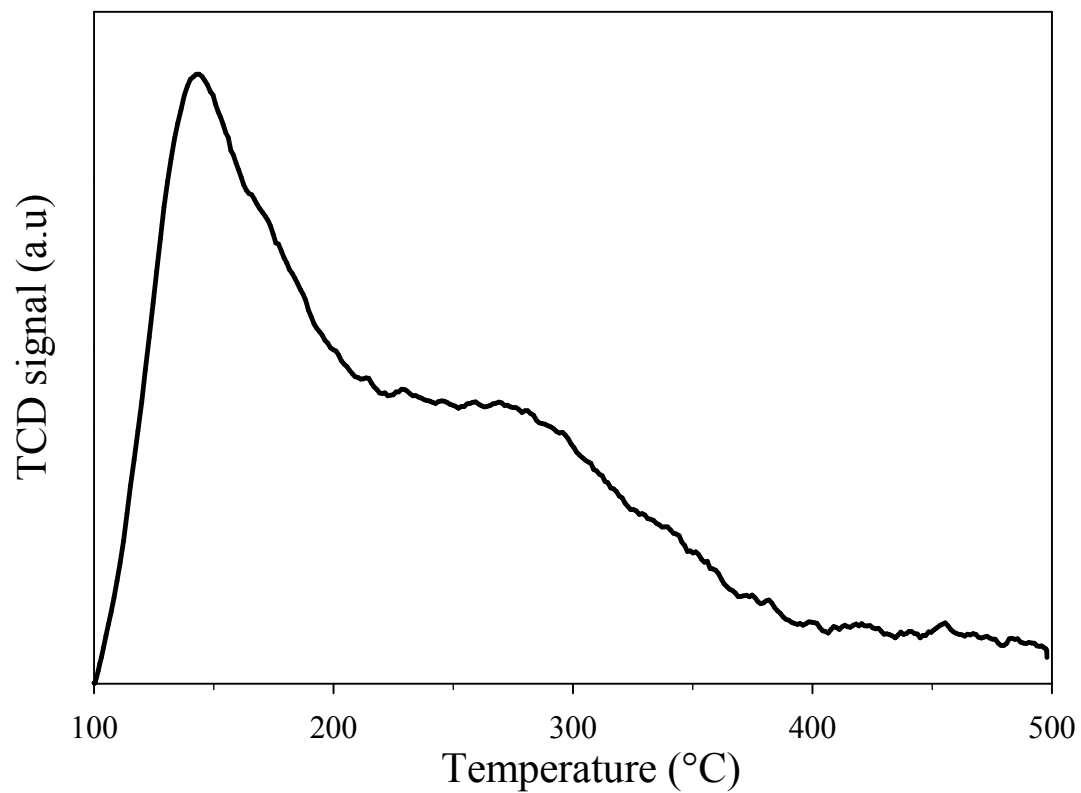

**SI Fig. S1** Profile of NH<sub>3</sub>- desorption profile of NBeta conducted temperature programmed desorption.

**Table S1** Surface area and pore size distributions of catalysts

| Catalyst    | BET-SA<br>(m <sup>2</sup> /g) | External-SA<br>(m <sup>2</sup> /g) <sup>a</sup> | Pore volume<br>(cc/g) <sup>b</sup> | Pore size<br>(nm) <sup>c</sup> |
|-------------|-------------------------------|-------------------------------------------------|------------------------------------|--------------------------------|
| NBeta       | 664                           | 241                                             | 0.35                               | 3.12                           |
| Sn-Pd-NBeta | 608                           | 195                                             | 0.31                               | 3.05                           |
| Cu-Pd-NBeta | 597                           | 201                                             | 0.32                               | 2.91                           |
| In-Pd-NBeta | 613                           | 182                                             | 0.29                               | 2.86                           |

<sup>a</sup> *t*-Plot method.

<sup>b</sup> Pore volume calculated from the desorption branch of N<sub>2</sub> physisorption isotherm.

<sup>c</sup> BJH desorption average pore diameter.

**Table S2** Comparison of performance of bimetallic catalysts for NO<sub>3</sub><sup>-</sup> reduction at different experimental conditions.

| Initial NO <sub>3</sub> <sup>-</sup> concentration (mg/L) | The amount of catalyst (g/L) | Support (Pd-M)                                    | BET surface area of support material (m <sup>2</sup> /g) | Reducing agent                            | Buffer                                     | k (10 <sup>-2</sup> ×min <sup>-1</sup> ) | K' (10 <sup>-2</sup> ×min <sup>-1</sup> g <sub>cat</sub> <sup>-1</sup> ) | K'' (10 <sup>-2</sup> ×L.min <sup>-1</sup> g <sub>Pd</sub> <sup>-1</sup> ) | NO <sub>3</sub> <sup>-</sup> Removal (%) | N <sub>2</sub> Selectivity (%) | NH <sub>4</sub> <sup>+</sup> Selectivity (%) | Ref.       |
|-----------------------------------------------------------|------------------------------|---------------------------------------------------|----------------------------------------------------------|-------------------------------------------|--------------------------------------------|------------------------------------------|--------------------------------------------------------------------------|----------------------------------------------------------------------------|------------------------------------------|--------------------------------|----------------------------------------------|------------|
| 221.43                                                    | 1                            | TiO <sub>2</sub><br>3%Pd:1%Cu                     | 50                                                       | H <sub>2</sub> (100mL/min)                | Mes buffer                                 | 4.80 **                                  | 23.98 **                                                                 | 159.6 **                                                                   | 100                                      | 50.2                           | 49.7                                         | 1          |
| 132.8                                                     | 1.25                         | α-Fe <sub>2</sub> O <sub>3</sub><br>2.8%Pd:1.6%Cu | 12.7                                                     | H <sub>2</sub> (30mL/min)                 | CO <sub>2</sub> (40mL/min)                 | 3.27 **                                  | 13.06 **                                                                 | 93.29 **                                                                   | 96.4                                     | 70                             | 30                                           | 2          |
| 132.8                                                     | 2.5                          | NZSM5<br>1.6%Pd:1.6%Sn                            | 447                                                      | H <sub>2</sub> (30mL/min)                 | CO <sub>2</sub> (60mL/min)                 | 16.40**                                  | 65.6**                                                                   | 410**                                                                      | 100                                      | 91.13                          | 9.87                                         | 4          |
| 100                                                       | 0.8                          | ASA<br>5%Pd:1.25%Cu                               | 375                                                      | H <sub>2</sub> (200mL/min)                | CO <sub>2</sub> (100mL/min)                | 6.45 **                                  | 16.14 **                                                                 | 161.25***                                                                  | 100                                      | 90.2                           | 9.8                                          | 5          |
| 100                                                       | 2.22                         | Al <sub>2</sub> O <sub>3</sub><br>4%Pd:1%Cu       | 196                                                      | H <sub>2</sub> (0.15atm)                  | 0.2M HCl                                   | 12.97 **                                 | 6.49 **                                                                  | 145.91***                                                                  | 100                                      | 82.3                           | 17.7                                         | 6          |
| 100                                                       | 1                            | TiO <sub>2</sub><br>2%Pd:1%Cu                     | 50                                                       | H <sub>2</sub> (60mL/min)                 | CO <sub>2</sub>                            | 6.66 **                                  | 66.62 **                                                                 | 333***                                                                     | 90                                       | 76                             | 19                                           | 7          |
| 100                                                       | 0.6                          | Al <sub>2</sub> O <sub>3</sub><br>2%Pd:1.7%Cu     | 196                                                      | H <sub>2</sub> (90mL/min)                 | CO <sub>2</sub> (100mL/min)                | 5.85 **                                  | 12.99 **                                                                 | 487.5 ***                                                                  | 100                                      | 74                             | 7.6 mg/L                                     | 8          |
| 100                                                       | 0.51                         | ACo<br>2%Pd:1%Cu                                  | 869                                                      | H <sub>2</sub> (200Ncm <sup>3</sup> /min) | CO <sub>2</sub> (200Ncm <sup>3</sup> /min) | 0.88 **                                  | 2.21 **                                                                  | 86.9**                                                                     | 99                                       | 43                             | 57                                           | 9          |
| 100                                                       | 0.51                         | CNT-TiO <sub>2</sub><br>1%Pd:1%Cu                 | 131                                                      | H <sub>2</sub> (200Ncm <sup>3</sup> /min) | CO <sub>2</sub> (200Ncm <sup>3</sup> /min) | 1.83 **                                  | 4.57 **                                                                  | 361.43 **                                                                  | 100                                      | 66                             | 34                                           | 10         |
| 100                                                       | 0.51                         | TiO <sub>2</sub><br>1%Pd:1%Cu                     | 50                                                       | H <sub>2</sub> (200Ncm <sup>3</sup> /min) | CO <sub>2</sub> (200Ncm <sup>3</sup> /min) | 1.76 **                                  | 4.40 **                                                                  | 347.6**                                                                    | 95                                       | 17                             | 83                                           | 10         |
| 100                                                       | 0.51                         | Ac-Mn<br>1%Pd:1%Cu                                | 269                                                      | H <sub>2</sub> (200Ncm <sup>3</sup> /min) | CO <sub>2</sub> (200Ncm <sup>3</sup> /min) | 0.31 **                                  | 0.77 **                                                                  | 61.23 **                                                                   | 59                                       | 60                             | 40                                           | 10         |
| 177.14                                                    | 7.69                         | Iron<br>0.3%Pd:0.5%Cu                             | 0.51                                                     | -                                         | -                                          | 0.67 *                                   | 1.34 **                                                                  | 29.03**                                                                    | 91.5                                     | 29.6                           | 65.6                                         | 11         |
| 100                                                       | 0.51                         | ACo<br>2%Pd:1%Cu                                  | 869                                                      | H <sub>2</sub> (200Ncm <sup>3</sup> /min) | CO <sub>2</sub> (200Ncm <sup>3</sup> /min) | 0.43 **                                  | 1.07 **                                                                  | 42.46**                                                                    | 67                                       | 55                             | 44                                           | 12         |
| 100                                                       | 1.62                         | Al <sub>2</sub> O <sub>3</sub><br>5%Pd:1.25%Cu    | 196                                                      | H <sub>2</sub> (500mL/min)                | pH 6                                       | 18.08 **                                 | 22.60 **                                                                 | 232.65 **                                                                  | 100                                      | 82                             | 5.1 mg/L                                     | 13         |
| 100                                                       | 1                            | AC<br>2%Pd:0.4%Cu                                 | 869                                                      | H <sub>2</sub> (333mL/min)                | CO <sub>2</sub> (333mL/min)                | 3.73 **                                  | 3.73 **                                                                  | 186.5**                                                                    | 74.4                                     | 51.3                           | 48.3                                         | 14         |
| 124                                                       | 1                            | Al <sub>2</sub> O <sub>3</sub><br>5%Pd:1.25%Sn    | 196                                                      | H <sub>2</sub> (50mL/min)                 | pH 5                                       | 3.39 **                                  | 3.39 **                                                                  | 67.8**                                                                     | 99                                       | 97                             | 3                                            | 15         |
| 100                                                       | 0.48                         | Al <sub>2</sub> O <sub>3</sub><br>4.4%Pd:1.21%Sn  | 155                                                      | H <sub>2</sub> (90mL/min)                 | CO <sub>2</sub> (90mL/min)                 | 1.23                                     | 3.51                                                                     | 58.31                                                                      | 100                                      | 88                             | 12                                           | 16         |
| 132.8                                                     | 2.5                          | NBeta<br>1.6%Pd:2.2%Cu                            | 664                                                      | H <sub>2</sub> (30mL/min)                 | CO <sub>2</sub> (60mL/min)                 | 2.31                                     | 9.24                                                                     | 57.75                                                                      | 100                                      | 92.68                          | 7.32                                         | This study |

|       |     |                         |     |                               |                                |       |       |        |     |       |       |               |
|-------|-----|-------------------------|-----|-------------------------------|--------------------------------|-------|-------|--------|-----|-------|-------|---------------|
| 132.8 | 2.5 | NBeta<br>1.6%Pd:2.2%In  | 664 | H <sub>2</sub> (30mL/<br>min) | CO <sub>2</sub> (60m<br>L/min) | 2.89  | 11.56 | 72.25  | 100 | 82.93 | 17.07 | This<br>study |
| 132.8 | 2.5 | NBeta<br>1.6%Pd:2.2% Sn | 664 | H <sub>2</sub> (30mL/<br>min) | CO <sub>2</sub> (60m<br>L/min) | 19.09 | 76.36 | 477.25 | 100 | 80.80 | 19.2  | This<br>study |

\*kinetic rate constant previously published in the literature.

\*\*kinetic rate constants and catalyst loading normalized rate constants calculated from this study using previously published datasets.

\*\*\*Only those values were selected which have R<sup>2</sup> values >0.95 for the first-order curve fitting using the previously published datasets.

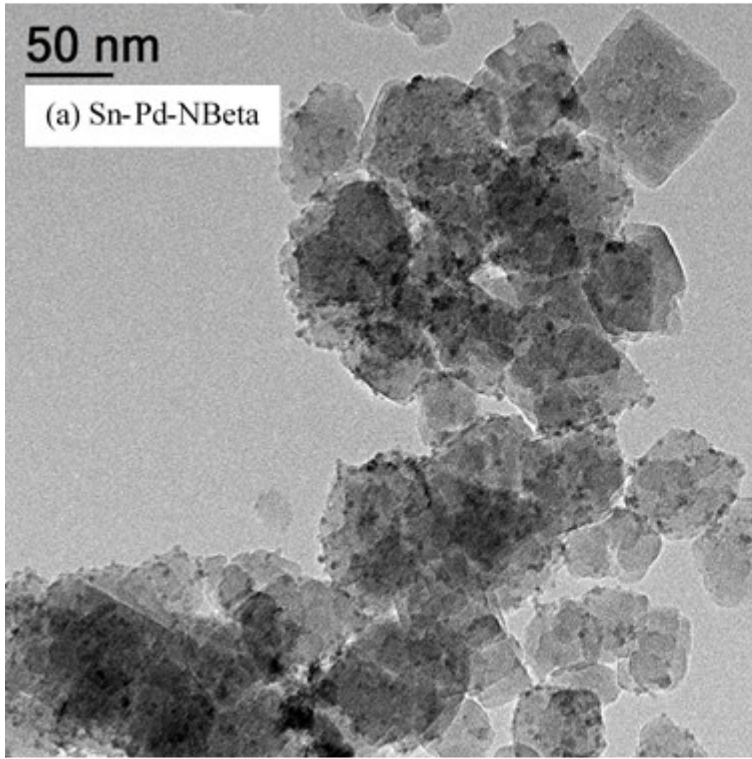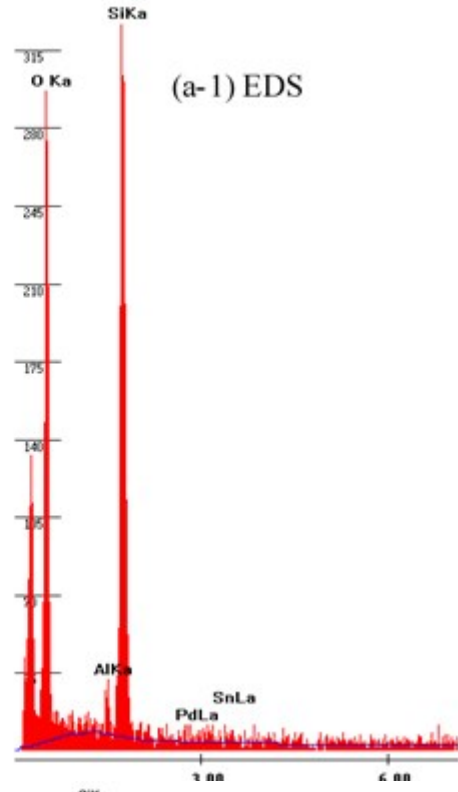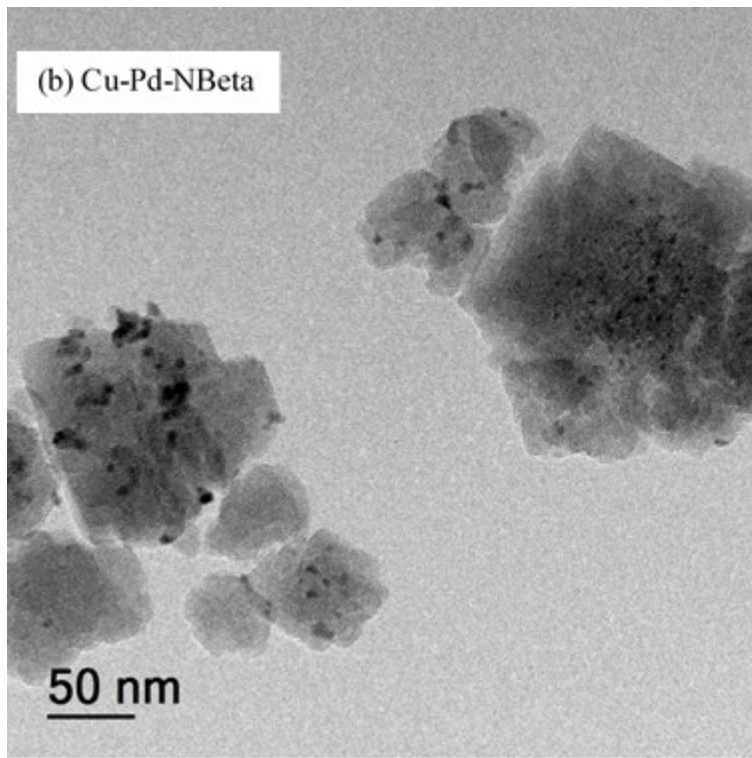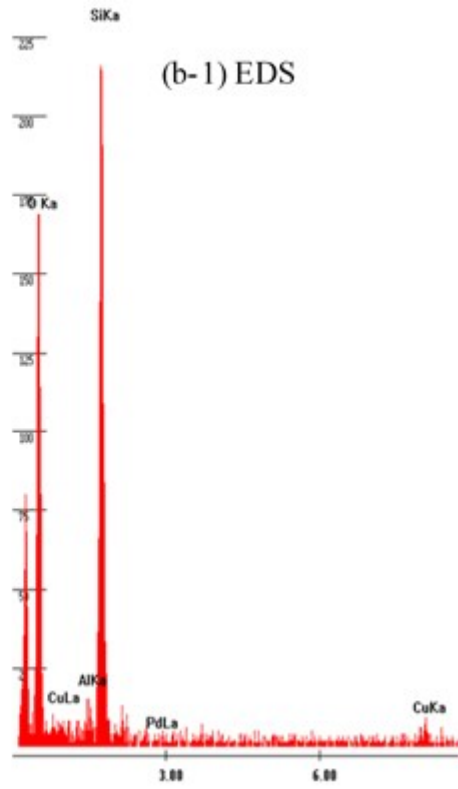



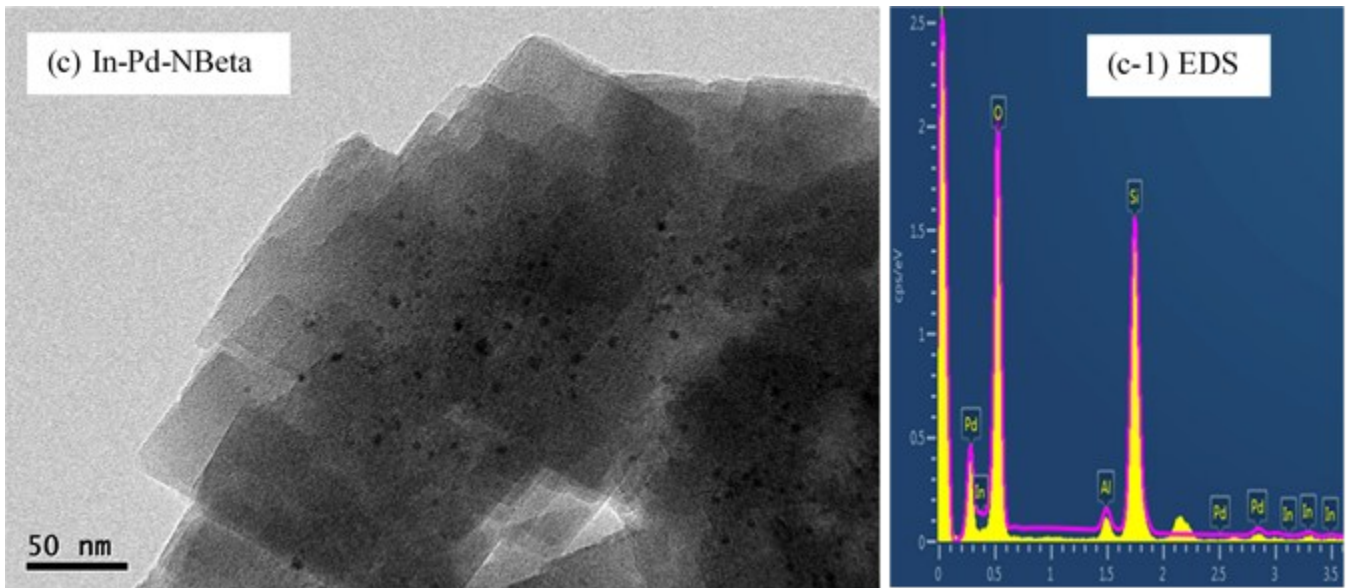

**SI Fig. S2** TEM images and EDX spectra of (a) Sn-Pd-NBeta, (b) Cu-Pd-NBeta, and (c) In-Pd-NBeta after recycling.

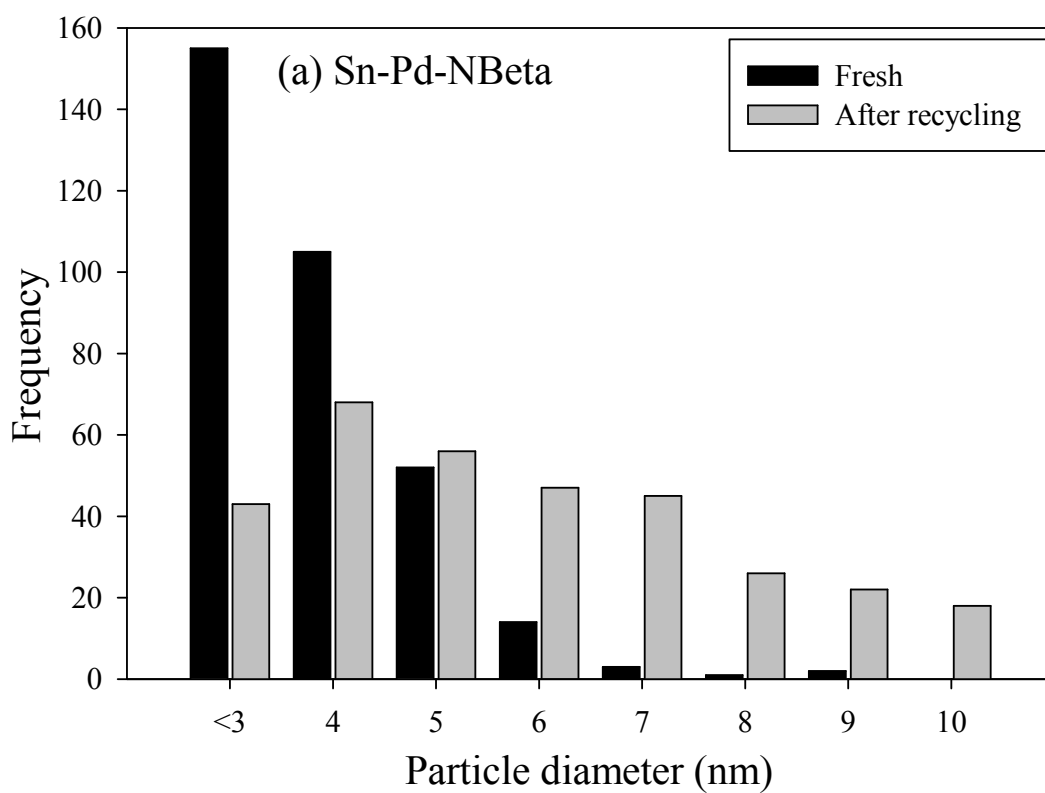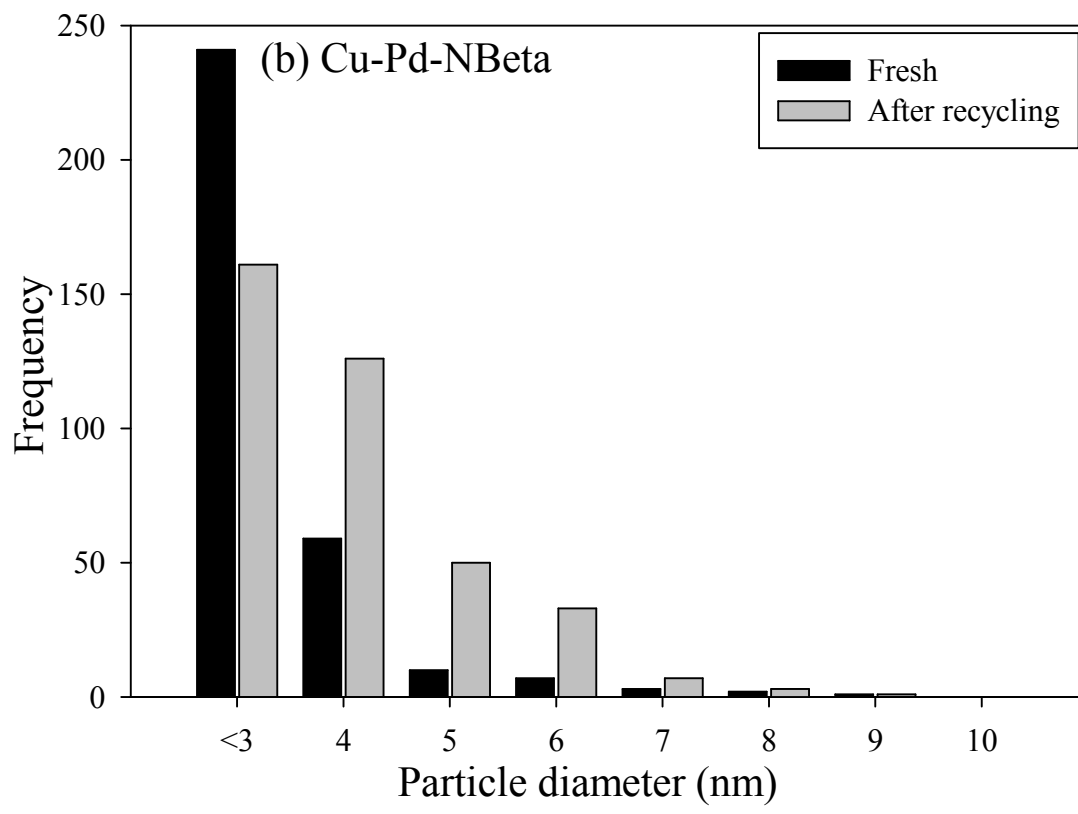

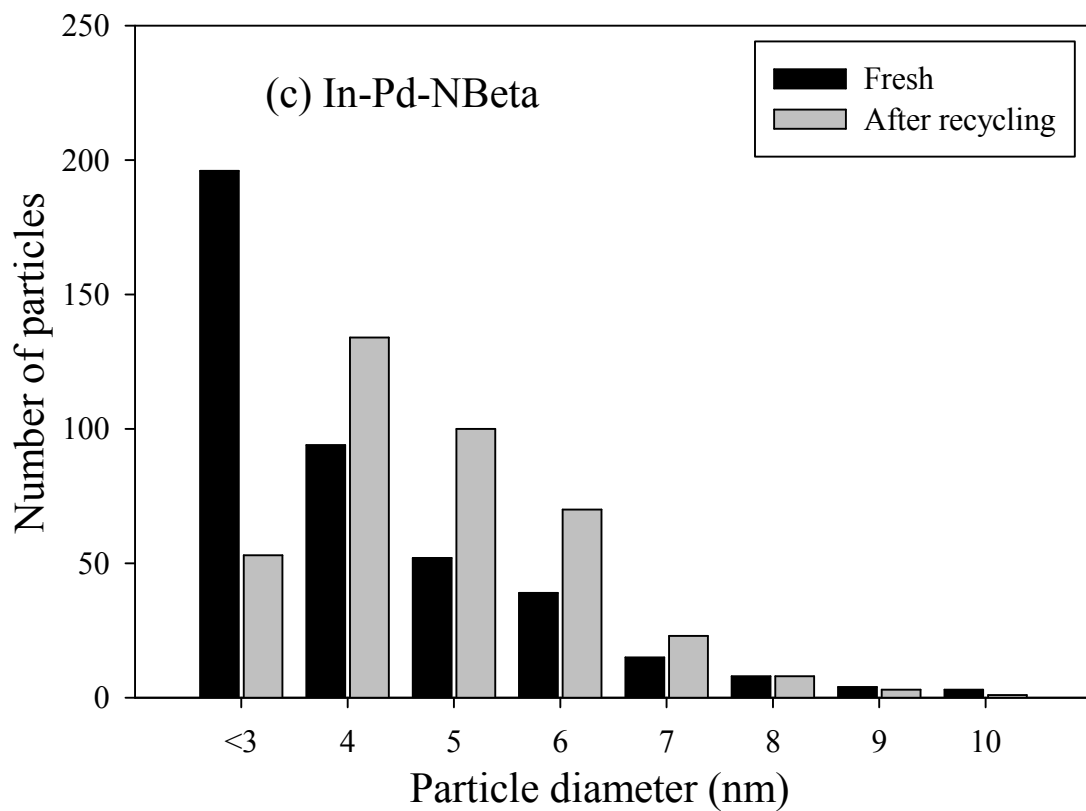

**SI Fig. S3** Particle size histogram of (a) Sn-Pd, (b) Cu-Pd, and (c) In-Pd metal particles on NBeta before and after recycling.

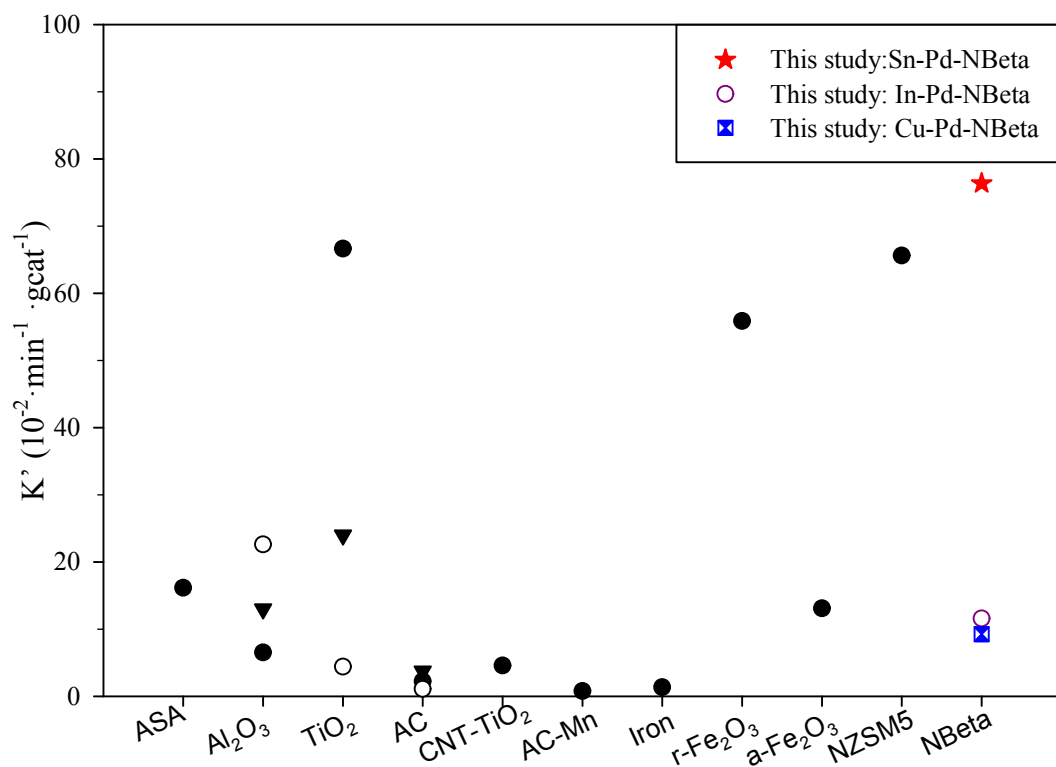

**SI Fig. S4** Comparison of removal efficiency, selectivities and kinetics of bimetallic catalysts for NO<sub>3</sub><sup>-</sup> reduction.

## References

- 1 S. Bae, J. Jung and W. Lee, *Chem. Eng. J.*, 2013, **232**, 327-337.
- 2 S. Jung, S. Bae and W. Lee, *Environ. Sci. Technol.*, 2014, **48**, 9651-9658.
- 3 S. Hamid, S. Bae, W. Lee, M. T. Amin and A. A. Alazba, *Ind. Eng. Chem. Res.*, 2015, **54**, 6247-6257.
- 4 S. Hamid, A. K. Macharla, and W. Lee, *Appl. Catal. B: Environ.*, 2016, **187**, 37-46.
- 5 Y. Xie, H. Cao, Y. Li, Y. Zhang and J. C. Crittenden, *Environ. Sci. Technol.*, 2011, **45**, 4066-4072.
- 6 Y. X. Chen, Y. Zhang and G. H. Chen, *Water Res.*, 2003, **37**, 2489-2495.
- 7 W. Gao, N. Guan, J. Chen, X. Guan, R. Jin, H. Zeng, Z. Liu and F. Zhang, *Appl. Catal. B: Environ.*, 2003, **46**, 341-351.
- 8 J. Sa, S. Gross and H. Vinek, *Appl. Catal. A*, 2005, **294**, 226-234.
- 9 O. S. G. P. Soares, J. J. M. Orfao, J. Ruiz-Martinez, J. Silvestre-Albero, A. Sepulveda-Escribano and M. F. R. Pereira, *Chem. Eng. J.*, 2010, **165**, 78-88.
- 10 O. S. G. P. Soares, J. J. M. Orfao and M. F. R. Pereira, *Desalination*, 2011, **279**, 367-374.
- 11 Y. H. Liou, C. J. Lin, S. C. Weng, H. H. Ou and S. L. Lo, *Environ. Sci. Technol.*, 2009, **43**, 2482-2488.
- 12 O. S. G. P. Soares, J. J. M. Orfao and M. F. R. Pereira, *Appl. Catal. B: Environ.*, 2009, **91**, 441-448.
- 13 S. Horold, T. Tacke and K. D. Vorlop, *Environ Technol.*, 1993, **14**, 931-945.
- 14 J. Trawczynski, P. Gheek, J. Okal, M. Zawadzki and M. J. Ilan Gomez, *Appl. Catal. A: Gen.*, 2011, **409-410**, 39-47.
- 15 U. Prusse, M. Hahnlein, J. Daum and K. D. Vorlop, *Catal. Today*, 2000, **55**, 79-90.
- 16 J. Sa, D. Gasparovicova, K. Hayek, E. Halwax, J. A. Anderson and H. Venek, *Catal. Lett.*, 2005, **105**, 209-217.
